# Supplementary material
Source: PubMed Central journal article supplement (PMC6498446)
Supplement: supp_7.2.E258_2018-0177-GRIPP2-checklist.pdf [file supp_7.2.E258_2018-0177-GRIPP2-checklist.pdf]

**Guidance for Reporting Involvement of Patients and Public (GRIPP) 2: Short-form checklist**

| <b>Section and topic</b>         | <b>Item</b>                                                                                                                                    | <b>Reported</b>     |
|----------------------------------|------------------------------------------------------------------------------------------------------------------------------------------------|---------------------|
| Aim                              | Report aim of PPI in the study                                                                                                                 | Introduction page 5 |
| Methods                          | Provide a clear description of the methods used for PPI in the study                                                                           | Methods page 5-6    |
| Study results                    | Outcomes – report the results of PPI in the study including both positive and negative outcomes                                                | Discussion page 14  |
| Discussion and conclusions       | Outcomes – comment on the extent to which PPI influenced the study overall. Describe positive and negative effects                             | Discussion page 14  |
| Reflections/critical perspective | Comment critically on the study, reflecting on the things that went well and those that did not, so that others can learn from this experience | Discussion page 14  |

Abbreviations: PPI, patient and public involvement
