# Supplementary material
Source: PubMed Central journal article supplement (PMC6498446)
Supplement: supp_7.2.E258_2018-0177-original-submission.pdf [file supp_7.2.E258_2018-0177-original-submission.pdf]

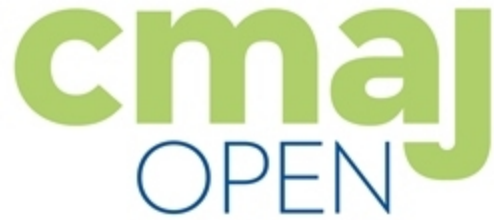

**Clinical care gaps and solutions in diabetes and advanced chronic kidney disease: a patient-oriented, qualitative research study (TEAM CARE)**

|                               |                                                                                                                                                                                                                                                                                                                                                                                                                                                                                                                                                                                                                                                                                                                                                                                                                                                                                                                                                                                                                                                                                                                                                                                                                                                                                                                                                                                                                                                                                                                                                                                                                                                            |
|-------------------------------|------------------------------------------------------------------------------------------------------------------------------------------------------------------------------------------------------------------------------------------------------------------------------------------------------------------------------------------------------------------------------------------------------------------------------------------------------------------------------------------------------------------------------------------------------------------------------------------------------------------------------------------------------------------------------------------------------------------------------------------------------------------------------------------------------------------------------------------------------------------------------------------------------------------------------------------------------------------------------------------------------------------------------------------------------------------------------------------------------------------------------------------------------------------------------------------------------------------------------------------------------------------------------------------------------------------------------------------------------------------------------------------------------------------------------------------------------------------------------------------------------------------------------------------------------------------------------------------------------------------------------------------------------------|
| Journal:                      | <i>CMAJ Open</i>                                                                                                                                                                                                                                                                                                                                                                                                                                                                                                                                                                                                                                                                                                                                                                                                                                                                                                                                                                                                                                                                                                                                                                                                                                                                                                                                                                                                                                                                                                                                                                                                                                           |
| Manuscript ID                 | CMAJOpen-2018-0177                                                                                                                                                                                                                                                                                                                                                                                                                                                                                                                                                                                                                                                                                                                                                                                                                                                                                                                                                                                                                                                                                                                                                                                                                                                                                                                                                                                                                                                                                                                                                                                                                                         |
| Manuscript Type:              | Qualitative                                                                                                                                                                                                                                                                                                                                                                                                                                                                                                                                                                                                                                                                                                                                                                                                                                                                                                                                                                                                                                                                                                                                                                                                                                                                                                                                                                                                                                                                                                                                                                                                                                                |
| Date Submitted by the Author: | 25-Oct-2018                                                                                                                                                                                                                                                                                                                                                                                                                                                                                                                                                                                                                                                                                                                                                                                                                                                                                                                                                                                                                                                                                                                                                                                                                                                                                                                                                                                                                                                                                                                                                                                                                                                |
| Complete List of Authors:     | Clemens, Kristin; Western University, Medicine<br>Getchell, Leah; Institute for Clinical Evaluative Sciences<br>Robinson, Tracy; London Health Sciences Centre Children's Hospital<br>Ryan, Bridget; The University of Western Ontario, Family Medicine<br>O'Donnell, James; St. Joseph's Health Care London<br>Reichert, Sonja; Western University, Family Medicine                                                                                                                                                                                                                                                                                                                                                                                                                                                                                                                                                                                                                                                                                                                                                                                                                                                                                                                                                                                                                                                                                                                                                                                                                                                                                       |
| Keywords:                     | Diabetes, Nephrology, Patient Oriented Research, Qualitative research                                                                                                                                                                                                                                                                                                                                                                                                                                                                                                                                                                                                                                                                                                                                                                                                                                                                                                                                                                                                                                                                                                                                                                                                                                                                                                                                                                                                                                                                                                                                                                                      |
| More Detailed Keywords:       |                                                                                                                                                                                                                                                                                                                                                                                                                                                                                                                                                                                                                                                                                                                                                                                                                                                                                                                                                                                                                                                                                                                                                                                                                                                                                                                                                                                                                                                                                                                                                                                                                                                            |
| Abstract:                     | <p>Background: Patients with diabetes and advanced chronic kidney disease (CKD) face a high burden of health care. As part of a patient-oriented research (POR) initiative to identify ways to better support their diabetes, in this study we explored their healthcare perceptions and solutions for patient-centered diabetes care.</p> <p>Methods: We engaged two patients with advanced CKD and diabetes to join our multidisciplinary team as full research partners. Our patient partners were involved in all aspects of our study design, conduct, analysis, and knowledge translation.</p> <p>We conducted a qualitative study with a purposive sample of 12 patients with a history of both diabetes (type 1 or 2) and advanced CKD including those using chronic dialysis. Semi-structured individual or focus group interviews were conducted from October 2017 until February 2018 until data saturation was complete. Individual and team analysis of the interviews were used to identify overarching themes.</p> <p>Results: Patients with advanced CKD and diabetes are burdened by medical appointments, strict conflicting diets, costly diabetes therapies, and fragmented and siloed healthcare. They identified that more self-management support, education and coordinated diabetes care might better support their diabetes.</p> <p>Interpretation: In this POR project, we learned of the many challenges that patients with complex medical comorbidities face while traversing a healthcare system organized around single disease. Researchers and policy makers should study and develop patient-centered diabetes care</p> |

1  
2  
3  
4  
5  
6  
7  
8  
9  
10  
11  
12  
13  
14  
15  
16  
17  
18  
19  
20  
21  
22  
23  
24  
25  
26  
27  
28  
29  
30  
31  
32  
33  
34  
35  
36  
37  
38  
39  
40  
41  
42  
43  
44  
45  
46  
47  
48  
49  
50  
51  
52  
53  
54  
55  
56  
57  
58  
59  
60

|  |                                                                                                                                                                                                                |
|--|----------------------------------------------------------------------------------------------------------------------------------------------------------------------------------------------------------------|
|  | strategies to better support these high-risk individuals. Involving patient partners in our work improved our connections with patients, along with the quality, acceptability, and relevance of our research. |
|  |                                                                                                                                                                                                                |

SCHOLARONE™  
Manuscripts

1  
2  
3 **Clinical care gaps and solutions in diabetes and advanced chronic kidney disease: a**  
4 **patient-oriented, qualitative research study (TEAM CARE)**  
5

6 Kristin K. Clemens MD MSc;<sup>1</sup> Leah Getchell MA;<sup>2</sup> Tracy Robinson MSc;<sup>3</sup> Bridget L. Ryan  
7 PhD;<sup>4</sup> Jim O'Donnell;<sup>5</sup> Sonja M. Reichert, MD, MSc<sup>6</sup>  
8  
9

- 10  
11  
12  
13  
14  
15  
16  
17  
18  
19  
20  
21  
22
1. Division of Endocrinology and Metabolism & Department of Epidemiology and Biostatistics, Western University, London Ontario Canada. Institute for Clinical Evaluative Sciences, Ontario Canada
  2. Institute for Clinical Evaluative Sciences, Ontario Canada
  3. Children's Hospital, London Health Sciences Centre, London Ontario Canada
  4. Department of Epidemiology and Biostatistics & Department of Family Medicine, Western University, London Ontario Canada
  5. St. Joseph's Health Care London, London Ontario Canada
  6. Centre for Studies in Family Medicine, Department of Family Medicine, Western University, London Ontario Canada

23 **Corresponding Author:** Dr. Kristin K. Clemens, St. Joseph's Health Care London, PO BOX  
24 5777 STN B, London Ontario Canada, N6A 4V2, Email: kristin.clemens@sjhc.london.on.ca  
25  
26  
27  
28  
29  
30  
31  
32  
33  
34  
35  
36  
37  
38  
39  
40  
41  
42  
43  
44  
45  
46  
47  
48  
49  
50  
51  
52  
53  
54  
55  
56  
57  
58  
59  
60

## Lay Summary

Diabetes care can benefit people with diabetes and advanced kidney disease. Unfortunately however, this care means more medical appointments. In this study we explored the healthcare experiences of people with diabetes and advanced kidney disease and reviewed their solutions for patient-friendly diabetes care.

We included two patients with advanced kidney disease and diabetes to join our study team as full research partners. Our patient partners were involved in all aspects of this study from its beginnings.

Our team interviewed 12 patients with diabetes and advanced kidney disease including those using dialysis. We learned that patients were burdened by numerous medical appointments. They noted communication issues between their care providers and felt that their providers only addressed one aspect of their disease. They faced challenges taking care of their diabetes and found therapies difficult to afford. Patients suggested that coordinated diabetes care, self-management support, and diabetes education might better support their diabetes.

In this project, we learned of the many challenges that patients with diabetes and kidney disease face in our current healthcare system. The development of patient-friendly diabetes care programs to better support these individuals should be considered.

## Abstract

**Background:** Patients with diabetes and advanced chronic kidney disease (CKD) face a high burden of health care. As part of a patient-oriented research (POR) initiative to identify ways to better support their diabetes, in this study we explored their healthcare perceptions and solutions for patient-centered diabetes care.

**Methods:** We engaged two patients with advanced CKD and diabetes to join our multidisciplinary team as full research partners. Our patient partners were involved in all aspects of our study design, conduct, analysis, and knowledge translation.

We conducted a qualitative study with a purposive sample of 12 patients with a history of both diabetes (type 1 or 2) and advanced CKD including those using chronic dialysis. Semi-structured individual or focus group interviews were conducted from October 2017 until February 2018 until data saturation was complete. Individual and team analysis of the interviews were used to identify overarching themes.

**Results:** Patients with advanced CKD and diabetes are burdened by medical appointments, strict conflicting diets, costly diabetes therapies, and fragmented and siloed healthcare. They identified that more self-management support, education and coordinated diabetes care might better support their diabetes.

**Interpretation:** In this POR project, we learned of the many challenges that patients with complex medical comorbidities face while traversing a healthcare system organized around single disease. Researchers and policy makers should study and develop patient-centered diabetes care strategies to better support these high-risk individuals. Involving patient partners in

1  
2  
3  
4  
5  
6  
7  
8  
9  
10  
11  
12  
13  
14  
15  
16  
17  
18  
19  
20  
21  
22  
23  
24  
25  
26  
27  
28  
29  
30  
31  
32  
33  
34  
35  
36  
37  
38  
39  
40  
41  
42  
43  
44  
45  
46  
47  
48  
49  
50  
51  
52  
53  
54  
55  
56  
57  
58  
59  
60

our work improved our connections with patients, along with the quality, acceptability, and  
relevance of our research.

Confidential

## Introduction

With better treatments and improved survival, patients with diabetes now often live with other medical conditions.(1) One of the most common comorbidities, affecting 25-50% of patients with diabetes, is chronic kidney disease (CKD).(2)

Patients with diabetes and advanced CKD are at high risk of hypoglycemia,(3) cardiovascular disease,(4) amputations, (5) retinopathy,(6) and other medical conditions.(7) They are often socioeconomically disadvantaged and have lower quality of life.(8) These individuals can benefit from diabetes-related care including glycemic management, cardiovascular protection, and screening for complications.(9–11) Unfortunately, this care means attending numerous medical appointments.(7) Before developing patient-centered strategies to support these individuals, a necessary first step is to understand their struggles, healthcare perceptions, needs and interests. (12)

Patient-oriented research (POR) focuses upon the priorities and outcomes relevant to patients. (13) In this study, we explored the burden of illness and healthcare perceptions of those living with advanced CKD and diabetes. We also identified their solutions for more supportive, patient-centered diabetes care. Herein, we report their healthcare perceptions and solutions.

## Methods

### Patient Partner Involvement

1  
2  
3 We invited patients with lived experience of diabetes and advanced CKD to join our research  
4 team as partners. Two individuals (one with advanced CKD and one using chronic hemodialysis)  
5  
6 joined. During the study, one partner unfortunately passed away.  
7  
8  
9

10  
11 Our patient partners assisted with the study design, development of the interview guide, and  
12 refinement of recruitment materials. They aided in participant interviews, data analysis, review  
13 of final outputs, and manuscript preparation. (14)  
14  
15  
16  
17  
18

### 19 Design and Setting

20  
21  
22 This study used a descriptive qualitative approach. (14) We conducted focus groups and 1:1  
23 semi-structured interviews with patients from two large academic centres (London Health  
24 Sciences Centre [LHSC], and St. Joseph's Health Care [SJHC]) in London, Ontario, Canada. We  
25 report this study using the Guidance for Reporting Involvement of Patients and Public (GRIPP2),  
26  
27 (15) and the Consolidated Criteria for Reporting Qualitative Studies (COREQ) checklists.(16)  
28  
29  
30  
31  
32  
33  
34

### 35 Recruitment

36  
37  
38 English-speaking adults  $\geq 18$  years with type 1 or type 2 diabetes *and* advanced CKD (self-  
39 reported CKD approaching dialysis, chronic peritoneal or hemodialysis) were considered for  
40 inclusion. We also included kidney transplant recipients if their transplant was less than two  
41 years prior. We excluded individuals who were too ill to participate.  
42  
43  
44  
45  
46  
47  
48

49 We recruited participants from outpatient endocrinology and nephrology clinics, and  
50 hemodialysis units between October 2017 and February 2018 using multiple strategies. We  
51 asked healthcare providers (e.g. hemodialysis nurses, physicians) and renal support programs  
52  
53  
54  
55  
56  
57  
58  
59  
60



1  
2  
3 (Patient & Family Advisory Council), to approach eligible individuals. If patients provided  
4 consent for our team members to contact them (LG, KKC, SMR), we recruited them by  
5  
6 telephone. Participants were also recruited in-person, from outpatient clinics and hemodialysis  
7  
8 units. We additionally placed recruitment posters in clinic areas. We purposefully sampled to  
9  
10 ensure diversity in age, sex, ethnicity and dialysis status.  
11  
12  
13

### 14 15 16 Ethics

17  
18  
19 This study was approved by the Health Sciences Research Ethics Board at Western University,  
20  
21 London, Ontario (REB #109561). Participants provided written and informed consent prior to  
22  
23 participating.  
24  
25

### 26 27 Data Collection

28  
29  
30 Between October 2017 and February 2018, we conducted interview sessions moderated by  
31  
32 experienced qualitative researchers (SMR, primary care physician; LG, anthropologist) as well  
33  
34 as an endocrinologist (KKC) and our patient partner (JO). Our physician investigators (KKC,  
35  
36 SMR) had no therapeutic relationship with participants whom they interviewed.  
37  
38  
39

40  
41 We initially planned to conduct two-hour, in-person (clinic) focus groups. However, due to  
42  
43 scheduling difficulties, we also conducted 1:1 semi-structured interviews either in person or by  
44  
45 telephone. Sessions were guided by an open and flexible interview guide.  
46  
47  
48

49 Interviews were audio-recorded and transcribed verbatim by an independent transcription  
50  
51 service, then checked for accuracy by each interviewer. Field notes captured interviewer  
52  
53  
54  
55  
56  
57  
58  
59  
60

1  
2  
3 perceptions and nuances of our communications. Transcripts were de-identified to preserve  
4  
5 confidentiality.  
6  
7

### 8 9 Data Analysis

10  
11  
12 We completed our data analysis simultaneously and iteratively with data collection. First,  
13  
14 investigators independently reviewed each transcript, noting key themes. The team then met to  
15  
16 discuss emerging themes and organize them into broad categories (coding template). With  
17  
18 subsequent transcripts, we continued to modify our coding template. We also identified exemplar  
19  
20 quotes reflecting the main themes. We ceased this first phase of analysis when all team members  
21  
22 agreed that data saturation had been achieved. We used Microsoft Word to maintain our coding  
23  
24 template.  
25  
26  
27

28  
29  
30 Upon completion of this phase, TR and KKC met to further interpret and synthesize the main  
31  
32 themes by creating a visual summary. Given the experience of our team, results were analyzed  
33  
34 from multiple perspectives: patient, provider, and researcher. We established credibility and  
35  
36 trustworthiness of our data using verbatim transcripts, independent and team analysis.  
37  
38  
39

## 40 **Results**

### 41 42 43 Participants

44  
45  
46 We approached 37 patients for participation. Seven declined (lived remotely, felt unwell, not  
47  
48 interested). Eighteen expressed interest initially, but did not consent (intercurrent illness,  
49  
50 scheduling difficulty, lack of contact).  
51  
52  
53  
54  
55  
56  
57  
58  
59  
60

1  
2  
3 We achieved data saturation after 12 interviews. Participants' mean age was 60 years, 42% were  
4 female, 58% were using dialysis, and 25% were kidney transplant recipients (and no longer  
5 receiving dialysis) (Table 1).  
6  
7  
8  
9

## 10 11 Findings

12  
13  
14 There were two broad themes that emerged from the data: 1) the care challenges that patients  
15 with diabetes and CKD faced; and 2) the articulation of possible solutions to improve care.

16  
17 Exemplar quotes are identified by type of interview (e.g. FG for focus group, INT for interview),  
18 type of diabetes (e.g. T1 for type 1 diabetes), sex (e.g. F for female) and stage of kidney disease  
19 (e.g. advanced, dialysis).  
20  
21  
22  
23  
24  
25  
26

## 27 Care Challenges

28  
29  
30  
31 Participants described several challenges in their healthcare. We organized these into seven  
32 themes, each described below. Our visual summary is illustrated in Figure 1.  
33  
34  
35

### 36 *Multiple medical appointments and care providers*

37  
38  
39  
40 Having complex comorbidities, participants had many medical appointments. Some found  
41 appointments particularly difficult to attend, especially when juggling their dialysis schedules  
42 and home life. Their appointments often conflicted with one another.  
43  
44  
45  
46  
47

48 They'll [providers] set up appointments and then they'll end up having appointments at  
49 the same time....Or sometimes they'll set up an appointment for me on this day and then  
50 the next one is on the next day, instead of trying to set them up so one's in the morning  
51 and one's in the afternoon – FG2 (T2MAAdvanced)  
52  
53  
54  
55  
56  
57

1  
2  
3 *Time demands on health professionals*  
4  
5

6 Participants recognized that their care providers had significant time demands. Appointments  
7 were short, and providers didn't have time to address their complex needs.  
8  
9

10  
11  
12 *"I go and see the diabetic doctor. And first of all, they've only got 10 or 15 minutes, because*  
13 *they just don't get any time. There are too many patients."* – FG1 (T2MAdvanced)  
14  
15  
16

17  
18 *Care fragmentation and siloes*  
19  
20

21 With their many appointments, participants described care fragmentation and siloes. Their  
22 medical specialists were only focused on one of their diseases and couldn't address others.  
23  
24  
25

26  
27 *"Say you have a number on one [blood test] and it's out of range, they're like, well, you'll have*  
28 *to talk to this specialist about that. We don't deal with that."* – FG1 (T2MAdvanced)  
29  
30  
31

32  
33 There was complete care fragmentation when patients moved, or when their kidney disease  
34 progressed. Patients transitioned from CKD clinics to dialysis teams, and to other medical  
35 specialists. With each transition, they had to recount their medical history, and build new  
36 relationships with providers. For some, moving from one care team to another, felt like  
37 abandonment.  
38  
39  
40  
41  
42  
43  
44

45  
46 And this group that we dealt with for years, the social worker, the dietician..all of a  
47 sudden, they came in and they shook my hand, and they said it's been nice knowing you,  
48 basically. And the minute we crossed the hall, all the people were gone out of the system,  
49 never to be dealt with again. And no one had ever said to us, at any time, when this  
50  
51  
52  
53  
54  
55  
56  
57  
58  
59  
60

1  
2  
3 happens, you're going to lose all these support people you've had for all this time... FG1  
4  
5 (T2MDialysis)  
6  
7

8  
9 Participants also noted siloes between care providers. Management plans were not well  
10  
11 summarized, documentation was not shared, and notes were not accessed.  
12  
13

14  
15 ... I keep bringing up, you guys have gone to the computers, why can't you look this  
16  
17 stuff up, all the blood tests, all the results? It's there in front of you, you type in my I.D.  
18  
19 number and everything comes up. So, why can't you do that? – FG1 (T2MAdvanced)  
20  
21

22  
23 Participants felt like the “go-between” between providers. They kept detailed records about their  
24  
25 own health so that they could share this amongst their care teams. Some felt responsible for care  
26  
27 coordination.  
28  
29

30  
31 ...The specialist is supposed to have the record and he say no I don't have the records...  
32  
33 And I think myself the most important thing, the records belong to me. I should have it  
34  
35 myself before everybody else because I go to different places and I don't know what's  
36  
37 going on. – FG3 (T2MDialysis)  
38  
39  
40

41 Participants were also frustrated by frequent, duplicated laboratory tests.  
42  
43

44  
45 *“But it would be nice if they would all get together and say, okay, this is what we need.” - FG 2*  
46  
47 *(T2MAdvanced)*  
48  
49

50 *Communication with patients*  
51  
52  
53  
54  
55  
56  
57  
58  
59  
60

1  
2  
3 Communication gaps were expressed between patients and care providers. In some instances,  
4 participants felt that their disease perspectives and management were not heard.  
5  
6

7  
8  
9 *“I told her when I do this you have to do this and she just didn’t even listen to me. She opened*  
10 *the thing and my clamp opened and blood went everywhere.” – INT1 (T2FDialysis)*  
11  
12

### 13 14 15 *Not enough patient education*

16  
17  
18 Some felt ill-informed about diabetes-related complications and the complexities of their disease.  
19  
20

21  
22 When I was diagnosed, it’s almost like the doctors are afraid to tell you what’s going to  
23 happen to you ...They don’t want you to freak out about it, so they either sugar coat it, or  
24 like well, you’re not that bad now. – FG1 (T2FAdvanced)  
25  
26  
27

### 28 29 30 *Costs associated with diabetes management*

31  
32  
33 There was a cost burden associated with self-managing diabetes. Supplies were often not covered  
34 and participants had out of pocket expenses for appointments.  
35  
36

37  
38  
39 *“In terms of the cost, a lot of things aren’t covered. Needles for insulin are not, which I have a*  
40 *bone to pick with that...” – FG 1 (T2MDialysis)*  
41  
42  
43

### 44 45 *Technologies*

46  
47  
48 Participants recognized the increasing availability of technology to support self-management.  
49  
50 Often however, they could not afford these technologies and found them difficult to use,  
51 especially if visually impaired.  
52  
53  
54  
55  
56  
57  
58  
59  
60

1  
2  
3 That would boggle my mind that they would create a piece of machinery for you to test  
4 your blood sugar...A lot of diabetics have low vision and you have the instructions on the  
5 machine itself, error message and stuff there and you can't see them. I just ignore them. –  
6  
7

8  
9  
10 FG 4 (T2MDialysis)  
11

### 12 13 *Diets*

14  
15  
16  
17 Dietary challenges were expressed by almost all participants. There were frustrated by diabetes  
18 and kidney diets that were strict and conflicting. Diets changed as their CKD progressed. There  
19 was frustration there were no experts knowledgeable in both kidney and diabetes diets.  
20  
21

22  
23  
24  
25 With [diabetes] we were taught to eat whole wheat breads and with the renal disease  
26 you're taught not to eat any of that, you're taught to eat white so the two diets kind of  
27 counteract. Like they're telling you one thing for sugar and they're telling you one thing  
28 for renal, so yeah there is a big change. – INT3 (T2FDialysis)  
29  
30  
31  
32  
33

### 34 35 *Possible Solutions*

36  
37  
38  
39 Recognizing the gaps in their healthcare, we asked participants about strategies that might better  
40 support their diabetes.  
41  
42

### 43 44 *Coordinated care*

45  
46  
47  
48 With multiple medical appointments, participants hoped that their care could be better  
49 coordinated, and even provided at a single appointment.  
50  
51  
52  
53  
54  
55  
56  
57  
58  
59  
60

1  
2  
3 “Just you go in with one visit and you can cover the gamut. You can talk to the dietician and you  
4 can talk to wound care. It’s all there.” – FG4 (T2MDialysis)  
5  
6  
7

8  
9 We also asked them about their interest in the provision of diabetes care in the dialysis unit. They  
10 expressed openness to education and counseling, foot screening and glycemic management.  
11  
12

13  
14 “It [dialysis-based program] would be a captive audience.” – FG2 (T2MDialysis)  
15  
16

17  
18 “Sure, keep you busy. You can do two things at once.” – FG3 (T2MDialysis)  
19  
20

### 21 *Self-management support*

22  
23 Participants valued self-management support. Some used applications to track blood sugars and  
24 dialysis parameters and wondered if this would be helpful to others. Some suggested that  
25 diabetes flow sheets and scorecards might keep self-management on track.  
26  
27  
28  
29  
30

31  
32  
33 The best thing I’ve got is an app on my phone...It keeps track of all my medications. It  
34 keeps track of your vitals so you can put in your blood sugars and all that. My INR can  
35 go in there, pulse, blood pressure, weight, doctor’s appointments and stuff like that. It’s  
36 the handiest thing. – FG2 (T2MAdvanced)  
37  
38  
39  
40  
41  
42

### 43 *Education*

44  
45  
46 Participants valued any opportunity for education. They wanted to learn more about their  
47 diabetes and kidney disease, diets, and complications. They suggested that websites, patient  
48 libraries, and waiting room resources might be valuable.  
49  
50  
51  
52  
53  
54  
55  
56  
57  
58  
59  
60



1  
2  
3 “...you should be able to go on a website and see that information, that should be available to  
4 you as a patient...So, that in the age that we now live in, that information is available...” FGI  
5  
6  
7  
8 (T2MAdvanced)  
9

## 11 **Interpretation**

12  
13  
14 Patients with diabetes and advanced CKD experience many challenges in their healthcare. They  
15 have numerous appointments, face siloed and fragmented care, conflicting and restrictive diets,  
16 and communication gaps with their providers. Their own self-management is hindered by the  
17 cost of diabetes supplies and technology.  
18  
19  
20  
21  
22  
23  
24

### 25 Comparison with previous research

26  
27  
28 There has been a paucity of research to investigate the challenges of living with both diabetes  
29 and advanced CKD from the patient perspective. In Australian and American studies of patients  
30 with diabetes and CKD, some expressed frustration with short appointments, duplicated tests and  
31 conflicting and segregated medical advice (17,18). They felt that the burden of care coordination  
32 rested upon their shoulders.(17)  
33  
34  
35  
36  
37  
38  
39  
40

41 Where care solutions have been explored, self-management support has been suggested as a  
42 means to empower patients who have demanding and complicated disease.(18) Targeted,  
43 culturally relevant education, might also help patients learn about their condition and treatments,  
44 both early and in advanced CKD.(18–20) Multidisciplinary clinics might promote  
45 communication between providers, reduce siloes, and make appointments more convenient. (18)  
46  
47  
48  
49  
50  
51  
52 Some patients have suggested that communication be mandatory between providers, and that  
53 parking costs be covered for appointments.(18)  
54  
55  
56  
57  
58  
59  
60

### Reflection on patient engagement

Patients were involved in this research project from its beginnings. This experience led to challenges, but also had benefits for our investigators and our study.

Regarding challenges, one of our patient partners passed away during the study. Our team not only dealt with his loss, but with the need to find a new partner. Because POR was new for our team and institution, there were also new processes to explore (e.g. ethics). To facilitate our learning, our engagement liaison (LG) held a joint workshop with both patients and investigators.

We also noted a disconnect between the timelines of patients and investigators. From an investigator perspective, protocols need to be written, grants obtained, and ethics submitted, before research can be conducted. Patients however, want research to be completed quickly and lead to better patient care as soon as possible. (21)

There were however, several benefits of including patient partners in research.(22) As an interviewer, our partner had natural connections with our participants, resulting in honest, candid conversations. During analysis, he brought his lived experience, and interpreted nuances and themes that we did not capture. Given his strong interest in moving this research into actionable benefits for patients, he kept us adherent to timelines, and suggested knowledge translation activities (e.g. educational video for patients with newly diagnosed diabetes).

Involving patient partners in research also benefitted our investigators. Our team came from a diversity of experience, and were able to share and reflect upon our own biases about each other. Physicians gained a clearer understanding of the great burden that multimorbidity places upon

1  
2  
3 our patients, and our patient partner learned that investigators care about the well-being of  
4 patients and have a vested interest in doing more to support them.  
5  
6  
7

### 8 9 Strengths and limitations

10  
11  
12 There are many strengths to the current study. We followed a strong qualitative approach and  
13 interviewed patients with a range of backgrounds to gain insight about their struggles from  
14 advanced CKD through dialysis. Where most studies of patients nearing or using dialysis do not  
15 address the priorities of patients,(13) patients contributed to all aspects of this work.  
16  
17  
18  
19

20  
21  
22 A limitation was that this was a small study from two academic centers and so our findings may  
23 not resonate with teams in other jurisdictions. Our participants were only English-speaking; non-  
24 English speaking individuals might have expressed other barriers to care. As organizing focus  
25 groups was challenging, we changed to 1:1 interviews midway through the study. However, in  
26 reviewing transcripts we did not notice any substantive differences in how participants  
27 responded. Finally, we only captured views of patients who agreed to participate in research.  
28  
29  
30  
31  
32  
33  
34  
35  
36  
37

### 38 **Conclusion and Directions**

39  
40  
41 Living with diabetes and advanced kidney disease is difficult, and patients face many challenges  
42 in their health care. The findings from this work will directly inform efforts to develop patient-  
43 centered diabetes care strategies for those living with advanced CKD.  
44  
45  
46  
47  
48  
49  
50  
51  
52  
53  
54  
55  
56  
57  
58  
59  
60

**Table 1. Characteristics of 12 study participants**

|                                  |           |
|----------------------------------|-----------|
| Age, yrs (mean)                  | 60.2      |
| Female                           | 5 (41.6)  |
| Type 2 diabetes                  | 10 (83.3) |
| Duration of diabetes, yrs (mean) | 19.3      |
| Current dialysis                 | 7 (58.3)  |
| Hemodialysis                     | 5 (71.4)  |
| Peritoneal dialysis              | 2 (28.6)  |
| Duration of dialysis, yrs (mean) | 2.5       |
| Transplant recipient             | 3 (25)    |

Unless indicated, data presented in number (percent).

Figure 1. Visual summary of themes

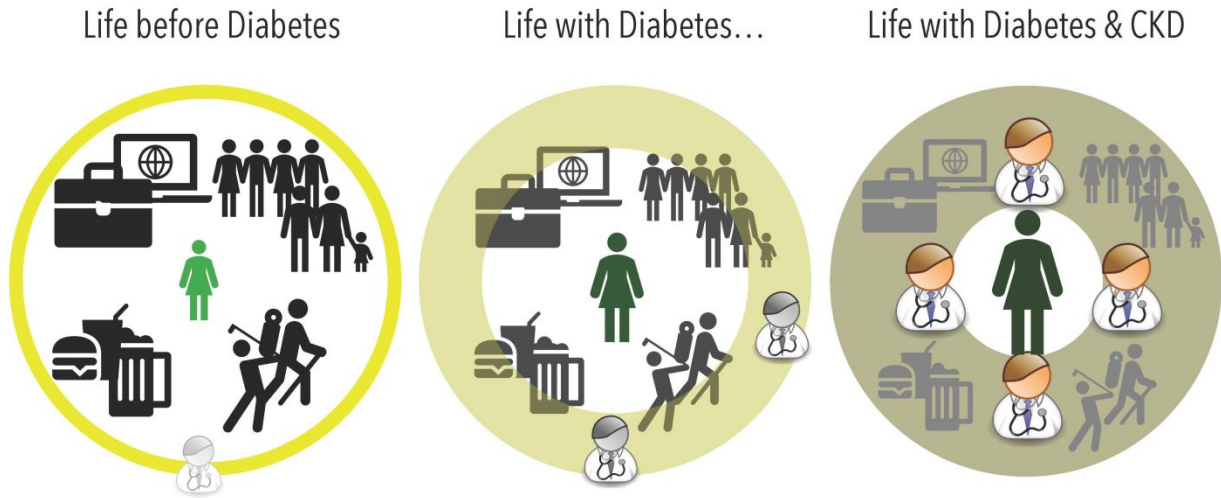

Confidential

## References

1. Piette JD, Kerr EA. The impact of comorbid chronic conditions on diabetes care. Vol. 29, Diabetes Care. 2006. p. 725–31.
2. Lloyd A, Komenda P. Optimizing care for Canadians with diabetic nephropathy in 2015. Can J Diabetes [Internet]. 2015;39(3):221–8. Available from: <http://ovidsp.ovid.com/ovidweb.cgi?T=JS&CSC=Y&NEWS=N&PAGE=fulltext&D=med8&AN=25805325>
3. Hodge, M; McArthur E; Garg, AX, Tangri NCK. Hypoglycemia risk by estimated glomerular filtration rate. Am J Kidney Dis. 2017; 70(1): 59-68
4. Pugliese G, Solini A, Bonora E, Orsi E, Zerbini G, Fondelli C, et al. Distribution of cardiovascular disease and retinopathy in patients with type 2 diabetes according to different classification systems for chronic kidney disease: a cross-sectional analysis of the renal insufficiency and cardiovascular events (RIACE) Itali. Cardiovasc Diabetol [Internet]. 2014 Jan [cited 2016 Feb 23];13:59. Available from: <http://www.pubmedcentral.nih.gov/articlerender.fcgi?artid=4008155&tool=pmcentrez&rendertype=abstract>
5. Pliakogiannis T, Bailey S, Cherukuri S, Taskapan H, Ahmad M, Oliver T, et al. Vascular complications of the lower extremities in diabetic patients on peritoneal dialysis. Clin Nephrol [Internet]. 2008;69(5):361–7. Available from: <http://ovidsp.ovid.com/ovidweb.cgi?T=JS&CSC=Y&NEWS=N&PAGE=fulltext&D=med6&AN=18538099>
6. Grunwald JE, Alexander J, Ying G-S, Maguire M, Daniel E, Whittock-Martin R, et al.

- 1  
2  
3 Retinopathy and chronic kidney disease in the Chronic Renal Insufficiency Cohort (CRIC)  
4 study. *Arch Ophthalmol* (Chicago, Ill 1960) [Internet]. 2012;130(9):1136–44. Available  
5 from: [http://www.pubmedcentral.nih.gov/articlerender.fcgi?artid=3719171&tool](http://www.pubmedcentral.nih.gov/articlerender.fcgi?artid=3719171&tool=pmcentrez&rendertype=abstract)  
6  
7  
8  
9  
10  
11  
12  
13 7. Clemens, KK, Ouedraogo, A, Nash, DM, Garg, AX SS. The health and healthcare of  
14 adults with type 1 and 2 diabetes across the estimated glomerular filtration rate spectrum.  
15 *Can J Diabetes*. 2018. June 21 [Epub ahead of print]  
16  
17  
18  
19  
20 8. Parsons DS, Harris DCH. A review of quality of life in chronic renal failure.  
21 *Pharmacoeconomics*. 1997;12(2):140–60.  
22  
23  
24  
25 9. Singh R, Nistala R, McFarlane SI, Whaley-Connell A. Glycemic control and  
26 cardiovascular disease in a high-risk chronic kidney disease population. *Therapy*  
27 [Internet]. 2009;6(4):507–13. Available from: [http://www.futuremedicine.com](http://www.futuremedicine.com/doi/pdf/10.2217/thy.09.38)  
28  
29  
30  
31  
32  
33  
34  
35  
36  
37  
38  
39  
40  
41 10. Baigent C, Landray MJ, Reith C, Emberson J, Wheeler DC, Tomson C, et al. The effects  
42 of lowering LDL cholesterol with simvastatin plus ezetimibe in patients with chronic  
43 kidney disease (Study of Heart and Renal Protection): a randomised placebo-controlled  
44 trial. *Lancet* (London, England) [Internet]. 2011 Jun 25 [cited 2016 Aug  
45  
46  
47  
48  
49  
50  
51  
52  
53  
54  
55  
56 11. McFarlane P a, Tobe SW, Culleton B. Improving outcomes in diabetes and chronic kidney  
57  
58  
59  
60

- disease: the basis for Canadian guidelines. *Can J Cardiol* [Internet]. 2007;23(7):585–90.  
Available from: <http://ovidsp.ovid.com/ovidweb.cgi?T=JS&CSC=Y&NEWS=N&PAGE=fulltext&D=med5&AN=17534468>
12. Harris J, Graue M, Dunning T, Haltbakk J, Austrheim G, Skille N, et al. Involving people with diabetes and the wider community in diabetes research: A realist review protocol. *Syst Rev*. 2015; 4: 146
13. Jun M, Manns B, Laupacis A, Manns L, Rehal B, Crowe S, et al. Assessing the extent to which current clinical research is consistent with patient priorities: A scoping review using a case study in patients on or nearing dialysis. *Can J Kidney Heal Dis*. 2015; 2: 35
14. Sandelowski M. Focus on Research Methods: Whatever Happened to Qualitative Description? *Res Nurs Health*. 2000; 23(4): 334-40
15. Staniszewska S, Brett J, Simera I, Seers K, Mockford C, Goodlad S, et al. GRIPP2 reporting checklists: Tools to improve reporting of patient and public involvement in research. *BMJ*. 2017; 358
16. Tong A, Sainsbury P, Craig J. Consolidated criteria for reporting qualitative research (COREQ): a 32-item checklist for interviews and focus groups. *Int J Qual Heal care J Int Soc Qual Heal Care* [Internet]. 2007 Dec 16 [cited 2018 Oct 15];19(6):349–57. Available from: <https://academic.oup.com/intqhc/article-lookup/doi/10.1093/intqhc/mzm042>
17. Sakraida TJ, Terada M, Cook PF, Buhring A. T2DM with stage 3 CKD self-management: health status, change stage, and social support. *Commun Nurs Res* [Internet]. 2010;43:608. Available from: <https://search.ebscohost.com/login.aspx?direct=true&db=ccm&AN=105080611&site=ehost-live>



- 1  
2  
3 18. Lo C, Ilic D, Teede H, Cass A, Fulcher G, Gallagher M, et al. The Perspectives of Patients  
4 on Health-Care for Co-Morbid Diabetes and Chronic Kidney Disease: A Qualitative  
5 Study. PLoS ONE [Electronic Resour [Internet]. 2016;11(1):e0146615. Available from:  
6  
7  
8 <http://ovidsp.ovid.com/ovidweb.cgi?T=JS&CSC=Y&NEWS=N&PAGE=fulltext&D=med>  
9  
10  
11  
12 [8&AN=26730708](http://ovidsp.ovid.com/ovidweb.cgi?T=JS&CSC=Y&NEWS=N&PAGE=fulltext&D=med)  
13
- 14  
15 19. Lopez-Vargas PA, Tong A, Howell M, Phoon RK, Chadban SJ, Shen Y, et al. Patient  
16 awareness and beliefs about the risk factors and comorbidities associated with chronic  
17 kidney disease : A mixed-methods study. Nephrology [Internet]. 2017;22(5):374–81.  
18 Available from: [http://ovidsp.ovid.com/ovidweb.cgi? T=JS&CSC=Y&NEWS](http://ovidsp.ovid.com/ovidweb.cgi?T=JS&CSC=Y&NEWS)  
19  
20  
21  
22  
23  
24  
25  
26 [=N&PAGE=fulltext&D=prem&AN=27248507](http://ovidsp.ovid.com/ovidweb.cgi?T=JS&CSC=Y&NEWS)
- 27 20. Wilkinson E, Randhawa G, Feehally J, Farrington K, Greenwood R, Choi P, et al. A  
28 multi-centre qualitative study exploring the experiences of UK South Asian and White  
29 Diabetic Patients referred for renal care. BMC Nephrol. 2012; 13:157  
30  
31  
32
- 33 21. Amirav I, Vandall-Walker V, Rasiah J, Saunders L. Patient and Researcher Engagement  
34 in Health Research: A Parent’s Perspective. Pediatrics. 2017; 140 (3)  
35  
36  
37  
38
- 39 22. Manafo E, Petermann L, Mason-Lai P, Vandall-Walker V. Patient engagement in Canada:  
40 A scoping review of the “how” and “what” of patient engagement in health research.  
41  
42  
43  
44  
45  
46  
47  
48  
49  
50  
51  
52  
53  
54  
55  
56  
57  
58  
59  
60 Health Research Policy and Systems. 2018; 16 (1): 5

**Guidance for Reporting Involvement of Patients and Public (GRIPP) 2: Short-form checklist**

| <b>Section and topic</b>         | <b>Item</b>                                                                                                                                    | <b>Reported</b>                             |
|----------------------------------|------------------------------------------------------------------------------------------------------------------------------------------------|---------------------------------------------|
| Aim                              | Report aim of PPI in the study                                                                                                                 | Introduction page 5                         |
| Methods                          | Provide a clear description of the methods used for PPI in the study                                                                           | Methods page 5-6                            |
| Study results                    | Outcomes – report the results of PPI in the study including both positive and negative outcomes                                                | Methods page 6<br>Interpretation page 16-17 |
| Discussion and conclusions       | Outcomes – comment on the extent to which PPI influenced the study overall. Describe positive and negative effects                             | Interpretation page 16-17                   |
| Reflections/critical perspective | Comment critically on the study, reflecting on the things that went well and those that did not, so that others can learn from this experience | Interpretation page 16-17                   |

Abbreviations: PPI, patient and public involvement

## COREQ (COnsolidated criteria for REporting Qualitative research) Checklist

A checklist of items that should be included in reports of qualitative research. You must report the page number in your manuscript where you consider each of the items listed in this checklist. If you have not included this information, either revise your manuscript accordingly before submitting or note N/A.

| Topic                                          | Item No. | Guide Questions/Description                                                                                                                              | Reported on Page No. |
|------------------------------------------------|----------|----------------------------------------------------------------------------------------------------------------------------------------------------------|----------------------|
| <b>Domain 1: Research team and reflexivity</b> |          |                                                                                                                                                          |                      |
| <i>Personal characteristics</i>                |          |                                                                                                                                                          |                      |
| Interviewer/facilitator                        | 1        | Which author/s conducted the interview or focus group?                                                                                                   |                      |
| Credentials                                    | 2        | What were the researcher's credentials? E.g. PhD, MD                                                                                                     |                      |
| Occupation                                     | 3        | What was their occupation at the time of the study?                                                                                                      |                      |
| Gender                                         | 4        | Was the researcher male or female?                                                                                                                       |                      |
| Experience and training                        | 5        | What experience or training did the researcher have?                                                                                                     |                      |
| <i>Relationship with participants</i>          |          |                                                                                                                                                          |                      |
| Relationship established                       | 6        | Was a relationship established prior to study commencement?                                                                                              |                      |
| Participant knowledge of the interviewer       | 7        | What did the participants know about the researcher? e.g. personal goals, reasons for doing the research                                                 |                      |
| Interviewer characteristics                    | 8        | What characteristics were reported about the interviewer/facilitator? e.g. Bias, assumptions, reasons and interests in the research topic                |                      |
| <b>Domain 2: Study design</b>                  |          |                                                                                                                                                          |                      |
| <i>Theoretical framework</i>                   |          |                                                                                                                                                          |                      |
| Methodological orientation and Theory          | 9        | What methodological orientation was stated to underpin the study? e.g. grounded theory, discourse analysis, ethnography, phenomenology, content analysis |                      |
| <i>Participant selection</i>                   |          |                                                                                                                                                          |                      |
| Sampling                                       | 10       | How were participants selected? e.g. purposive, convenience, consecutive, snowball                                                                       |                      |
| Method of approach                             | 11       | How were participants approached? e.g. face-to-face, telephone, mail, email                                                                              |                      |
| Sample size                                    | 12       | How many participants were in the study?                                                                                                                 |                      |
| Non-participation                              | 13       | How many people refused to participate or dropped out? Reasons?                                                                                          |                      |
| <i>Setting</i>                                 |          |                                                                                                                                                          |                      |
| Setting of data collection                     | 14       | Where was the data collected? e.g. home, clinic, workplace                                                                                               |                      |
| Presence of non-participants                   | 15       | Was anyone else present besides the participants and researchers?                                                                                        |                      |
| Description of sample                          | 16       | What are the important characteristics of the sample? e.g. demographic data, date                                                                        |                      |
| <i>Data collection</i>                         |          |                                                                                                                                                          |                      |
| Interview guide                                | 17       | Were questions, prompts, guides provided by the authors? Was it pilot tested?                                                                            |                      |
| Repeat interviews                              | 18       | Were repeat interviews carried out? If yes, how many?                                                                                                    |                      |
| Audio/visual recording                         | 19       | Did the research use audio or visual recording to collect the data?                                                                                      |                      |
| Field notes                                    | 20       | Were field notes made during and/or after the interview or focus group?                                                                                  |                      |
| Duration                                       | 21       | What was the duration of the interviews or focus group?                                                                                                  |                      |
| Data saturation                                | 22       | Was data saturation discussed?                                                                                                                           |                      |
| Transcripts returned                           | 23       | Were transcripts returned to participants for comment and/or                                                                                             |                      |

| Topic                                  | Item No. | Guide Questions/Description                                                                                                        | Reported on Page No. |
|----------------------------------------|----------|------------------------------------------------------------------------------------------------------------------------------------|----------------------|
|                                        |          | correction?                                                                                                                        |                      |
| <b>Domain 3: analysis and findings</b> |          |                                                                                                                                    |                      |
| <i>Data analysis</i>                   |          |                                                                                                                                    |                      |
| Number of data coders                  | 24       | How many data coders coded the data?                                                                                               |                      |
| Description of the coding tree         | 25       | Did authors provide a description of the coding tree?                                                                              |                      |
| Derivation of themes                   | 26       | Were themes identified in advance or derived from the data?                                                                        |                      |
| Software                               | 27       | What software, if applicable, was used to manage the data?                                                                         |                      |
| Participant checking                   | 28       | Did participants provide feedback on the findings?                                                                                 |                      |
| <i>Reporting</i>                       |          |                                                                                                                                    |                      |
| Quotations presented                   | 29       | Were participant quotations presented to illustrate the themes/findings?<br>Was each quotation identified? e.g. participant number |                      |
| Data and findings consistent           | 30       | Was there consistency between the data presented and the findings?                                                                 |                      |
| Clarity of major themes                | 31       | Were major themes clearly presented in the findings?                                                                               |                      |
| Clarity of minor themes                | 32       | Is there a description of diverse cases or discussion of minor themes?                                                             |                      |

Developed from: Tong A, Sainsbury P, Craig J. Consolidated criteria for reporting qualitative research (COREQ): a 32-item checklist for interviews and focus groups. *International Journal for Quality in Health Care*. 2007. Volume 19, Number 6: pp. 349 – 357

**Once you have completed this checklist, please save a copy and upload it as part of your submission. DO NOT include this checklist as part of the main manuscript document. It must be uploaded as a separate file.**
